# Supplementary material for: Pressure-preferred symmetric reactions of 4,4′-bipyridine hydrobromide
Source: Royal Society of Chemistry journal article supplement (doi:10.1039/c6ce00356g), 2016-01-01
Supplement: c6ce00356g1.pdf [file c6ce00356g1.pdf]

# Supporting Information

## Pressure-preferred symmetric reactions of 4,4'-bipyridine hydrobromide

Michalina Anioła and Andrzej Katrusiak\*

Faculty of Chemistry, Adam Mickiewicz University, Umultowska 89b, 61-614 Poznań, Poland

\*Corresponding author. E-mail: karan@amu.edu.pl

**Table S1.** Comparison of CH $\cdots$ Br contacts in the structure of 4,4'-biPy2CH<sub>3</sub>Br calculated for the methyl-group orientation obtained by using constrains AFIX 33 and AFIX 137. Because the H $\cdots$ Br contacts are shorter for the AFIX 33 constrain, this model has been accepted for the discussions in the text.

| 4,4'-biPy2CH <sub>3</sub> Br     |                   |                   |                     |                   |                   |                     |
|----------------------------------|-------------------|-------------------|---------------------|-------------------|-------------------|---------------------|
| CH $\cdots$ Br                   | AFIX 33           |                   |                     | AFIX 137          |                   |                     |
|                                  | H $\cdots$ Br (Å) | C $\cdots$ Br (Å) | C-H $\cdots$ Br (°) | H $\cdots$ Br (Å) | C $\cdots$ Br (Å) | C-H $\cdots$ Br (°) |
| C6-H6 $\cdots$ Br <sup>i</sup>   | 2.793             | 3.664(22)         | 156                 | 2.794             | 3.668(21)         | 157                 |
| C2-H2 $\cdots$ Br <sup>ii</sup>  | 2.830             | 3.592(18)         | 140                 | 2.825             | 3.589(18)         | 140                 |
| C3-H3 $\cdots$ Br <sup>iii</sup> | 2.770             | 3.662(20)         | 161                 | 2.772             | 3.663(20)         | 161                 |
| C7-H7b $\cdots$ Br <sup>ii</sup> | 3.036             | 3.795(26)         | 137                 | 3.212             | 3.792(26)         | 121                 |
| C7-H7c $\cdots$ Br <sup>iv</sup> | 2.955             | 3.722(25)         | 138                 | 3.029             | 3.713(24)         | 129                 |

**Table S2.** Crystal data and structure-refinements details for 44'biPy2HBr.

|                                                                    |                                             |                  |                  |                 |                   |
|--------------------------------------------------------------------|---------------------------------------------|------------------|------------------|-----------------|-------------------|
| Pressure                                                           | 0.10(2) MPa                                 | 0.10(2) GPa      | 0.20 (2) GPa     | 0.50(2) GPa     | 1.00(2) GPa       |
| Temperature (K)                                                    | 296(2)                                      | 296(2)           | 296(2)           | 296(2)          | 296(2)            |
| Formula weight                                                     | 318.02                                      | 318.02           | 318.02           | 318.02          | 318.02            |
| Wavelength (Å)                                                     | 0.71073                                     | 0.71073          | 0.71073          | 0.71073         | 0.71073           |
| Crystal system                                                     | Triclinic                                   | Triclinic        | Triclinic        | Triclinic       | Triclinic         |
| Space group                                                        | $P\bar{1}$                                  | $P\bar{1}$       | $P\bar{1}$       | $P\bar{1}$      | $P\bar{1}$        |
| Unit cell dimensions (Å, °)                                        |                                             |                  |                  |                 |                   |
| <i>a</i>                                                           | 4.8986(6)                                   | 4.8839(15)       | 4.874(4)         | 4.8450(11)      | 4.8011(17)        |
| <i>b</i>                                                           | 7.6614(10)                                  | 7.622(5)         | 7.567(6)         | 7.453(2)        | 7.275(4)          |
| <i>c</i>                                                           | 7.9890(9)                                   | 7.951(4)         | 7.936(4)         | 7.875(5)        | 7.759(5)          |
| $\alpha$                                                           | 70.464(11)                                  | 70.87(6)         | 70.73(6)         | 70.89(4)        | 71.06(6)          |
| $\beta$                                                            | 87.005(10)                                  | 86.78(4)         | 86.64(5)         | 86.82(4)        | 86.46(5)          |
| $\gamma$                                                           | 77.176(11)                                  | 77.39(5)         | 77.47(7)         | 77.82(2)        | 78.64(4)          |
| Volume (Å <sup>3</sup> )                                           | 275.44(6)                                   | 272.8(3)         | 269.7(3)         | 262.61(19)      | 251.3(2)          |
| Z                                                                  | 1                                           | 1                | 1                | 1               | 1                 |
| Calculated density (g/cm <sup>3</sup> )                            | 1.917                                       | 1.935            | 1.958            | 2.011           | 2.101             |
| Absorption coefficient (mm <sup>-1</sup> )                         | 0.408                                       | 7.389            | 7.476            | 7.677           | 8.022             |
| F(000)                                                             | 154                                         | 154              | 154              | 154             | 154               |
| Crystal size (mm)                                                  | 0.30/0.15/0.12                              | 0.24/0.12/0.11   | 0.21/0.16/0.11   | 0.26/0.11/0.10  | 0.26/0.11/0.10    |
| $\theta$ -range for data collection (°)                            | 4.27 to 25.29                               | 2.71 to 27.71    | 4.65 to 27.20    | 4.30 to 26.44   | 4.33 to 34.93     |
| Min/max indices:h, k, l                                            | -5/5, -9/9, -9/9                            | -6/6, -2/2, -8/8 | -6/6, -4/4, -9/9 | -6/6,-9/9, -3/3 | -7/7,-11/11, -4/4 |
| Reflect. Collected/unique                                          | 3434 / 905                                  | 1219 / 183       | 1159 / 185       | 953 / 155       | 1865/309          |
| R <sub>int</sub>                                                   | 0.0219                                      | 0.1986           | 0.0953           | 0.0487          | 0.0942            |
| Refinement method                                                  | Full-matrix least-squares on F <sup>2</sup> |                  |                  |                 |                   |
| Completeness (%)                                                   | 90.7                                        | 14.2             | 15.3             | 14.5            | 14.0              |
| Data/restraints/parameters                                         | 905/0/64                                    | 183/0/ 22        | 185/6/34         | 155/6/34        | 309/0/34          |
| Goodness-of-fit on F <sup>2</sup>                                  | 1.045                                       | 1.211            | 1.048            | 1.438           | 1.006             |
| Final R <sub>1</sub> /wR <sub>2</sub> (I>2 $\sigma$ <sub>1</sub> ) | 0.0184/0.0448                               | 0.0623/0.1467    | 0.0487/0.1178    | 0.0332/0.0656   | 0.0511/0.1094     |
| R <sub>1</sub> /wR <sub>2</sub> (all data)                         | 0.0193/0.0451                               | 0.0670/0.1523    | 0.0535/0.1238    | 0.0427/0.0693   | 0.0820/0.1273     |

**Table S3.** Crystal data and structure-refinements details for 44'biPy2CH<sub>3</sub>Br.

|                                                                                            |                                             |
|--------------------------------------------------------------------------------------------|---------------------------------------------|
| Pressure                                                                                   | 0.35(2) GPa                                 |
| Temperature (K)                                                                            | 296(2)                                      |
| Formula weight                                                                             | 318.02                                      |
| Wavelength (Å)                                                                             | 0.71073                                     |
| Crystal system                                                                             | Monoclinic                                  |
| Space group                                                                                | <i>P2<sub>1</sub>/c</i>                     |
| Unit cell dimensions (Å, °)                                                                |                                             |
| <i>a</i>                                                                                   | 5.947(3)                                    |
| <i>b</i>                                                                                   | 8.068(8)                                    |
| <i>c</i>                                                                                   | 13.411(5)                                   |
| $\alpha$                                                                                   | 90                                          |
| $\beta$                                                                                    | 95.94(3)                                    |
| $\gamma$                                                                                   | 90                                          |
| Volume (Å <sup>3</sup> )                                                                   | 640.0(7)                                    |
| <i>Z</i>                                                                                   | 2                                           |
| Calculated density (g/cm <sup>3</sup> )                                                    | 1.796                                       |
| Absorption coefficient (mm <sup>-1</sup> )                                                 | 6.308                                       |
| F(000)                                                                                     | 340                                         |
| Crystal size (mm)                                                                          | 0.28/0.22/0.15                              |
| $\theta$ -range for data collection (°)                                                    | 3.05 to 27.23                               |
| Min/max indices:h, k, l                                                                    | -7/7, -4/4, -16/16                          |
| Reflect. Collected/unique                                                                  | 2131/313                                    |
| <i>R</i> <sub>int</sub>                                                                    | 0.2281                                      |
| Refinement method                                                                          | Full-matrix least-squares on F <sup>2</sup> |
| Completeness (%)                                                                           | 21.8                                        |
| Data/restraints/parameters                                                                 | 313/0/33                                    |
| Goodness-of-fit on F <sup>2</sup>                                                          | 1.041                                       |
| Final <i>R</i> <sub>1</sub> / <i>wR</i> <sub>2</sub> ( <i>I</i> >2 $\sigma$ <sub>1</sub> ) | 0.0879/0.2298                               |
| <i>R</i> <sub>1</sub> / <i>wR</i> <sub>2</sub> (all data)                                  | 0.0970/0.2400                               |

**Table S4.** Symmetry codes used for the shortest contacts in 44'biPy2HBr and 44'biPy2CH<sub>3</sub>Br.

| Code        | Symmetry code | Code                       | Symmetry code     |
|-------------|---------------|----------------------------|-------------------|
| 44'biPy2HBr |               | 44'biPy2CH <sub>3</sub> Br |                   |
| i           | 1+x, y, z     | j                          | 1+x, y, z         |
| ii          | 1-x, 1-y, 2-z | jj                         | 1+x, 0.5-y, 0.5+z |
| iii         | x, 1+y, z     | jjj                        | x, 0.5-y, 0.5+z   |
| iv          | 1-x, 1-y, 1-z | jv                         | 1-x, 1-y, 1-z     |

**Table S5.** The shortest NH $\cdots$ Br and CH $\cdots$ Br contacts in 44'biPy2HBr and 44'biPy2CH<sub>3</sub>Br.

| DH $\cdots$ A                     | H $\cdots$ A (Å) | D $\cdots$ A (Å) | DH $\cdots$ A (°) |
|-----------------------------------|------------------|------------------|-------------------|
| <b>44'biPy2HBr</b>                |                  |                  |                   |
| <b>0.1 MPa</b>                    |                  |                  |                   |
| <b>NH<math>\cdots</math>Br</b>    |                  |                  |                   |
| N1-H1 $\cdots$ Br1 <sup>i</sup>   | 2.447            | 3.207(2)         | 148               |
| <b>CH<math>\cdots</math>Br</b>    |                  |                  |                   |
| C2-H2 $\cdots$ Br1 <sup>ii</sup>  | 2.805            | 3.523(3)         | 135               |
| C3-H3 $\cdots$ Br1 <sup>iii</sup> | 3.042            | 3.621(2)         | 122               |
| C6-H6 $\cdots$ Br1 <sup>iv</sup>  | 2.896            | 3.616(3)         | 135               |
| <b>0.1 GPa</b>                    |                  |                  |                   |
| <b>NH<math>\cdots</math>Br</b>    |                  |                  |                   |
| N1-H1 $\cdots$ Br1 <sup>i</sup>   | 2.387            | 3.148(23)        | 148               |
| <b>CH<math>\cdots</math>Br</b>    |                  |                  |                   |
| C2-H2 $\cdots$ Br1 <sup>ii</sup>  | 2.810            | 3.522(15)        | 134               |
| C3-H3 $\cdots$ Br1 <sup>iii</sup> | 3.002            | 3.598(42)        | 123               |
| C6-H6 $\cdots$ Br1 <sup>iv</sup>  | 2.804            | 3.514(21)        | 134               |
| <b>0.2 GPa</b>                    |                  |                  |                   |
| <b>NH<math>\cdots</math>Br</b>    |                  |                  |                   |
| N1-H1 $\cdots$ Br1 <sup>i</sup>   | 2.572            | 3.276(44)        | 140               |
| <b>CH<math>\cdots</math>Br</b>    |                  |                  |                   |
| C2-H2 $\cdots$ Br1 <sup>ii</sup>  | 2.834            | 3.511(14)        | 130               |
| C3-H3 $\cdots$ Br1 <sup>iii</sup> | 2.993            | 3.524(57)        | 118               |
| C6-H6 $\cdots$ Br1 <sup>iv</sup>  | 2.876            | 3.528(33)        | 128               |
| <b>0.5 GPa</b>                    |                  |                  |                   |
| <b>NH<math>\cdots</math>Br</b>    |                  |                  |                   |
| N1-H1 $\cdots$ Br1 <sup>i</sup>   | 2.464            | 3.190(19)        | 142               |
| <b>CH<math>\cdots</math>Br</b>    |                  |                  |                   |
| C2-H2 $\cdots$ Br1 <sup>ii</sup>  | 2.751            | 3.419(53)        | 130               |
| C3-H3 $\cdots$ Br1 <sup>iii</sup> | 3.013            | 3.518(22)        | 116               |
| C6-H6 $\cdots$ Br1 <sup>iv</sup>  | 2.886            | 3.578(56)        | 132               |
| <b>1.0 GPa</b>                    |                  |                  |                   |
| <b>NH<math>\cdots</math>Br</b>    |                  |                  |                   |
| N1-H1 $\cdots$ Br1 <sup>i</sup>   | 2.481            | 3.184(17)        | 139               |
| <b>CH<math>\cdots</math>Br</b>    |                  |                  |                   |
| C2-H2 $\cdots$ Br1 <sup>ii</sup>  | 2.840            | 3.469(43)        | 126               |
| C3-H3 $\cdots$ Br1 <sup>iii</sup> | 2.897            | 3.438(18)        | 118               |
| C6-H6 $\cdots$ Br1 <sup>iv</sup>  | 2.796            | 3.531(44)        | 137               |
| <b>44'biPy2CH<sub>3</sub>Br</b>   |                  |                  |                   |
| <b>0.35 GPa</b>                   |                  |                  |                   |
| <b>CH<math>\cdots</math>Br</b>    |                  |                  |                   |
| C6-H6 $\cdots$ Br1 <sup>j</sup>   | 2.793            | 3.664(22)        | 156               |
| C2-H2 $\cdots$ Br1 <sup>ii</sup>  | 2.830            | 3.592(18)        | 140               |
| C3-H3 $\cdots$ Br1 <sup>iii</sup> | 2.770            | 3.662(20)        | 161               |
| C7-H7b $\cdots$ Br1 <sup>ii</sup> | 3.036            | 3.795(26)        | 137               |
| C7-H7c $\cdots$ Br1 <sup>iv</sup> | 2.955            | 3.722(25)        | 138               |
